# Supplementary material for: A Dietary Model of Partial Meat Replacement with Walnuts Demonstrates Changes in the Nutrient Profile and Quality of the United States Population’s Diet
Source: MDPI journal article supplement (doi:10.3390/nu15214518), 2023-10-25
Supplement: s1 [file s1]

Supplemental Table S1: Percentage of individuals with nutrient intakes below the EAR<sup>a</sup> at current intake (usual diet) and modeled intake when replacing meat with equivalent<sup>b</sup> amount of walnuts

| Age-gender group | Vitamin B12                           |                        |                        |                        |                        | Iron                                  |                        |                        |                        |                        |
|------------------|---------------------------------------|------------------------|------------------------|------------------------|------------------------|---------------------------------------|------------------------|------------------------|------------------------|------------------------|
|                  | % below EAR (95% confidence interval) |                        |                        |                        |                        | % below EAR (95% confidence interval) |                        |                        |                        |                        |
|                  | Current                               | Replacement 1<br>oz eq | Replacement 2<br>oz eq | Replacement 3<br>oz eq | Replacement 4<br>oz eq | Current                               | Replacement 1<br>oz eq | Replacement 2<br>oz eq | Replacement 3<br>oz eq | Replacement 4<br>oz eq |
| Male 4–8         | 0.2<br>(0.0-0.4)                      | 1.5<br>(0.7-2.2)*      | 4.3<br>(2.6-6.0)*      | 9.4<br>(6.6-12.1)*     | 16.8<br>(12.4-21.2)*   | 0.1<br>(-0.0-0.3)                     | 0.2<br>(0.0-0.4)       | 0.2<br>(0.0-0.5)       | 0.3<br>(0.0-0.5)       | 0.3<br>(0.0-0.5)       |
| Male 9–13        | 1.3<br>(0.6-2.0)                      | 5.1<br>(3.2-7.0)*      | 10.9<br>(8.0-13.8)*    | 18.3<br>(14.4-22.3)*   | 26.1<br>(21.1-31.1)*   | 1.5<br>(0.5-2.5)                      | 1.6<br>(0.6-2.7)       | 1.8<br>(0.6-2.9)       | 1.9<br>(0.7-3.2)       | 2.2<br>(0.8-3.5)       |
| Male 14–18       | 5.3<br>(3.6-7.1)                      | 13.2<br>(10.5-16.0)*   | 22.0<br>(18.5-25.5)*   | 30.4<br>(26.7-34.2)*   | 39.2<br>(35.0-43.4)*   | 9.5<br>(6.2-12.8)                     | 9.9<br>(6.5-13.3)      | 10.4<br>(6.9-14.0)     | 10.9<br>(7.2-14.6)     | 11.5<br>(7.7-15.3)     |
| Male 4–18        | 2.5<br>(1.6-3.4)                      | 7.1<br>(5.5-8.6)*      | 13.1<br>(10.9-15.2)*   | 20.2<br>(17.7-22.6)*   | 28.2<br>(25.2-31.2)*   | 4.1<br>(2.6-5.6)                      | 4.3<br>(2.8-5.9)       | 4.6<br>(3.0-6.2)       | 4.8<br>(3.1-6.5)       | 5.1<br>(3.4-6.8)       |
| Female 4–8       | 0.6<br>(0.0-1.2)                      | 3.1<br>(1.5-4.6)*      | 8.3<br>(5.8-10.9)*     | 17.7<br>(13.7-21.7)*   | 29.8<br>(24.8-34.9)*   | 0.3<br>(0.1-0.6)                      | 0.4<br>(0.1-0.6)       | 0.4<br>(0.1-0.7)       | 0.5<br>(0.1-0.8)       | 0.5<br>(0.1-0.9)       |
| Female 9–13      | 2.7<br>(1.5-3.9)                      | 9.1<br>(6.6-11.5)*     | 17.8<br>(13.9-21.7)*   | 29.2<br>(24.1-34.2)*   | 40.3<br>(34.7-45.9)*   | 1.7<br>(0.8-2.5)                      | 1.8<br>(0.9-2.7)       | 2.0<br>(1.0-3.0)       | 2.2<br>(1.1-3.2)       | 2.3<br>(1.2-3.4)       |
| Female 14–18     | 12.0<br>(8.5-15.5)                    | 25.9<br>(21.7-30.2)*   | 40.1<br>(35.4-44.9)*   | 52.7<br>(48.3-57.0)*   | 63.4<br>(59.2-67.5)*   | 19.3<br>(15.3-23.2)                   | 20.0<br>(15.9-24.1)    | 21.0<br>(16.8-25.2)    | 21.8<br>(17.6-26.1)    | 22.7<br>(18.3-27.1)    |
| Female 4–18      | 5.4<br>(3.7-7.1)                      | 13.3<br>(10.9-15.7)*   | 22.9<br>(19.9-25.9)*   | 34.1<br>(30.6-37.6)*   | 45.4<br>(41.8-49.0)*   | 7.5<br>(6.0-9.0)                      | 7.8<br>(6.2-9.4)       | 8.2<br>(6.6-9.9)       | 8.6<br>(6.9-10.3)      | 9.0<br>(7.3-10.7)      |
| Child 4–18       | 3.9<br>(2.6-5.1)                      | 10.0<br>(8.2-11.8)*    | 17.8<br>(15.5-20.0)*   | 26.8<br>(24.2-29.4)*   | 36.4<br>(33.5-39.2)*   | 5.7<br>(4.5-7.0)                      | 6.0<br>(4.7-7.3)       | 6.3<br>(5.0-7.7)       | 6.6<br>(5.2-8.0)       | 7.0<br>(5.5-8.4)       |
| Male 19–50       | 5.0<br>(3.5-6.5)                      | 12.4<br>(9.9-15.0)*    | 20.5<br>(17.4-23.6)*   | 28.6<br>(24.9-32.2)*   | 37.1<br>(33.1-41.0)*   | 3.4<br>(2.5-4.3)                      | 3.7<br>(2.7-4.6)       | 3.9<br>(2.9-4.8)       | 4.1<br>(3.1-5.1)       | 4.4<br>(3.3-5.4)       |
| Female 19–50     | 13.6<br>(10.6-16.6)                   | 28.1<br>(24.1-32.0)*   | 42.1<br>(37.4-46.8)*   | 54.5<br>(49.8-59.2)*   | 64.9<br>(60.4-69.4)*   | 25.2<br>(21.9-28.5)                   | 26.0<br>(22.6-29.3)    | 26.8<br>(23.4-30.2)    | 27.7<br>(24.3-31.1)    | 28.6<br>(25.1-32.1)    |
| Adult 19–50      | 8.9<br>(6.8-11.0)                     | 19.5<br>(16.6-22.5)*   | 30.3<br>(26.9-33.8)*   | 40.3<br>(36.6-44.0)*   | 49.7<br>(46.0-53.4)*   | 13.3<br>(11.4-15.2)                   | 13.8<br>(11.9-15.7)    | 14.3<br>(12.4-16.2)    | 14.8<br>(12.9-16.8)    | 15.4<br>(13.3-17.4)    |
| Male 51–70       | 5.6<br>(3.9-7.3)                      | 13.6<br>(11.1-16.1)*   | 22.9<br>(19.8-25.9)*   | 32.6<br>(28.9-36.4)*   | 41.9<br>(37.9-45.8)*   | 3.0<br>(2.1-3.9)                      | 3.2<br>(2.2-4.1)       | 3.4<br>(2.4-4.3)       | 3.6<br>(2.6-4.6)       | 3.8<br>(2.8-4.8)       |
| Female 51–70     | 16.8<br>(12.7-21.0)                   | 33.1<br>(28.1-38.1)*   | 48.3<br>(43.0-53.7)*   | 61.6<br>(56.2-66.9)*   | 71.2<br>(66.1-76.3)*   | 3.6<br>(2.6-4.6)                      | 3.9<br>(2.9-5.0)       | 4.3<br>(3.2-5.4)       | 4.6<br>(3.5-5.8)       | 5.0<br>(3.8-6.1)       |
| Adult 51–70      | 11.0<br>(8.3-13.8)                    | 23.0<br>(19.5-26.5)*   | 35.2<br>(31.4-39.1)*   | 46.6<br>(42.6-50.7)*   | 56.1<br>(52.2-60.0)*   | 3.3<br>(2.4-4.1)                      | 3.5<br>(2.6-4.4)       | 3.8<br>(2.9-4.7)       | 4.1<br>(3.1-5.1)       | 4.4<br>(3.4-5.3)       |
| Adult 71+        | 9.4<br>(4.3-14.4)                     | 21.5<br>(13.6-29.3)    | 35.6<br>(26.2-45.0)*   | 49.2<br>(40.8-57.6)*   | 60.0<br>(51.7-68.3)*   | 2.3<br>(1.1-3.5)                      | 2.5<br>(1.2-3.8)       | 2.7<br>(1.4-4.1)       | 3.0<br>(1.6-4.4)       | 3.2<br>(1.8-4.7)       |
| Male 19–71+      | 5.2<br>(3.7-6.7)                      | 12.9<br>(10.6-15.3)*   | 21.6<br>(18.8-24.4)*   | 30.5<br>(27.3-33.6)*   | 39.4<br>(36.1-42.6)*   | 3.2<br>(2.6-3.9)                      | 3.4<br>(2.8-4.1)       | 3.7<br>(3.0-4.3)       | 3.9<br>(3.2-4.6)       | 4.1<br>(3.4-4.9)       |
| Female 19–71+    | 14.5<br>(11.1-17.8)                   | 29.6<br>(25.4-33.8)*   | 44.3<br>(39.8-48.9)*   | 57.4<br>(53.1-61.6)*   | 67.6<br>(63.5-71.7)*   | 15.6<br>(13.7-17.6)                   | 16.2<br>(14.2-18.2)    | 16.9<br>(14.8-18.9)    | 17.5<br>(15.4-19.6)    | 18.1<br>(16.0-20.2)    |
| Adult 19–71+     | 9.6<br>(7.3-11.9)                     | 20.8<br>(17.8-23.8)*   | 32.4<br>(29.0-35.7)*   | 43.2<br>(39.8-46.5)*   | 52.7<br>(49.4-56.0)*   | 9.1<br>(8.0-10.2)                     | 9.5<br>(8.4-10.6)      | 9.9<br>(8.8-11.0)      | 10.3<br>(9.2-11.5)     | 10.7<br>(9.6-11.9)     |

\*95% confidence intervals of percentages from those below/above recommended and modeled replacement do not overlap

<sup>a</sup>EAR, estimated average requirement: A nutrient intake value that is estimated to meet the requirement of half the healthy individuals in a group

<sup>b</sup>One ounce equivalent (eq) per Protein Foods Group is 0.5 oz nuts and 1 oz meat (20, p. 49). Therefore, we modeled the replacement of 1, 2, 3, and 4 oz eqs meat with 0.5, 1, 1.5, and 2 oz walnuts.

Supplemental Table S2: Percentage of individuals below EAR<sup>a</sup> for magnesium and above AI<sup>b</sup> for fiber (both under-consumed nutrients) at current intake (usual diet) and modeled intake when replacing meat with equivalent<sup>c</sup> amount of walnuts

| Age-gender group | Magnesium<br>% below EAR (95% confidence interval) |                        |                        |                        |                        | Fiber (g/1,000 kcal)<br>% above AI (95% confidence interval) |                        |                        |                        |                        |
|------------------|----------------------------------------------------|------------------------|------------------------|------------------------|------------------------|--------------------------------------------------------------|------------------------|------------------------|------------------------|------------------------|
|                  | Current                                            | Replacement 1<br>oz eq | Replacement 2<br>oz eq | Replacement 3<br>oz eq | Replacement 4<br>oz eq | Current                                                      | Replacement 1<br>oz eq | Replacement 2<br>oz eq | Replacement 3<br>oz eq | Replacement 4<br>oz eq |
| Male 4–8         | 4.4<br>(2.9-5.9)                                   | 1.8<br>(1.0-2.6)*      | 0.7<br>(0.3-1.0)*      | 0.2<br>(0.0-0.4)*      | 0.0<br>(0.0-0.1)*      | 1.0<br>(0.4-1.7)                                             | 1.1<br>(0.4-1.9)       | 1.3<br>(0.5-2.2)       | 1.7<br>(0.7-2.7)       | 2.1<br>(1.0-3.3)       |
| Male 9–13        | 41.2<br>(35.2-47.1)                                | 32.0<br>(26.2-37.9)    | 23.6<br>(18.4-28.8)*   | 16.5<br>(11.9-21.1)*   | 10.8<br>(7.2-14.5)*    | 0.8<br>(0.3-1.3)                                             | 0.9<br>(0.3-1.4)       | 1.1<br>(0.4-1.7)       | 1.3<br>(0.5-2.1)       | 1.6<br>(0.6-2.6)       |
| Male 14–18       | 82.7<br>(79.6-85.9)                                | 79.3<br>(75.9-82.8)    | 75.2<br>(71.4-78.9)*   | 70.3<br>(66.3-74.3)*   | 65.1<br>(60.8-69.4)*   | 0.4<br>(0.1-0.8)                                             | 0.5<br>(0.1-0.9)       | 0.6<br>(0.2-1.1)       | 0.8<br>(0.3-1.3)       | 0.9<br>(0.3-1.6)       |
| Male 4–18        | 45.7<br>(43.3-48.0)                                | 40.7<br>(38.3-43.0)*   | 36.1<br>(33.8-38.3)*   | 31.8<br>(29.6-34.0)*   | 28.0<br>(25.8-30.1)*   | 0.7<br>(0.2-1.2)                                             | 0.8<br>(0.3-1.4)       | 1.0<br>(0.4-1.6)       | 1.2<br>(0.5-1.9)       | 1.5<br>(0.7-2.4)       |
| Female 4–8       | 6.3<br>(4.7-7.8)                                   | 2.7<br>(1.8-3.7)*      | 1.1<br>(0.5-1.6)*      | 0.4<br>(0.1-0.6)*      | 0.1<br>(0.0-0.2)*      | 2.0<br>(1.0-3.0)                                             | 2.3<br>(1.2-3.3)       | 2.7<br>(1.5-3.8)       | 3.2<br>(1.8-4.5)       | 3.8<br>(2.3-5.4)       |
| Female 9–13      | 50.6<br>(45.2-55.9)                                | 40.5<br>(35.2-45.8)    | 30.9<br>(26.0-35.8)*   | 21.9<br>(17.6-26.2)*   | 14.5<br>(11.0-18.0)*   | 1.1<br>(0.5-1.8)                                             | 1.3<br>(0.5-2.0)       | 1.6<br>(0.8-2.4)       | 1.9<br>(1.0-2.7)       | 2.2<br>(1.3-3.1)       |
| Female 14–18     | 89.0<br>(85.9-92.0)                                | 86.0<br>(82.7-89.4)    | 81.8<br>(78.2-85.5)*   | 76.8<br>(73.0-80.6)*   | 70.9<br>(66.9-75.0)*   | 0.9<br>(0.3-1.4)                                             | 1.0<br>(0.4-1.6)       | 1.3<br>(0.6-2.0)       | 1.6<br>(0.8-2.4)       | 2.0<br>(1.0-2.9)       |
| Female 4–18      | 51.2<br>(48.3-54.1)                                | 45.6<br>(42.6-48.5)    | 40.2<br>(37.2-43.1)*   | 35.0<br>(32.2-37.8)*   | 30.2<br>(27.6-32.9)*   | 1.3<br>(0.6-2.0)                                             | 1.5<br>(0.7-2.2)       | 1.8<br>(1.0-2.6)       | 2.2<br>(1.3-3.1)       | 2.6<br>(1.6-3.6)       |
| Child 4–18       | 48.3<br>(46.1-50.5)                                | 43.0<br>(40.9-45.1)*   | 38.0<br>(36.0-40.0)*   | 33.3<br>(31.4-35.2)*   | 29.0<br>(27.3-30.8)*   | 1.0<br>(0.4-1.6)                                             | 1.1<br>(0.5-1.7)       | 1.4<br>(0.7-2.0)       | 1.7<br>(0.9-2.4)       | 2.0<br>(1.1-2.9)       |
| Male 19–50       | 66.0<br>(62.7-69.2)                                | 60.8<br>(57.5-64.2)    | 55.3<br>(51.7-58.8)*   | 49.5<br>(45.8-53.2)*   | 43.2<br>(39.6-46.9)*   | 0.4<br>(0.1-0.8)                                             | 0.5<br>(0.1-0.8)       | 0.5<br>(0.1-1.0)       | 0.7<br>(0.2-1.2)       | 0.8<br>(0.2-1.4)       |
| Female 19–50     | 65.2<br>(61.5-69.0)                                | 57.8<br>(53.8-61.7)    | 49.7<br>(45.9-53.5)*   | 41.1<br>(37.5-44.8)*   | 32.3<br>(28.8-35.9)*   | 0.7<br>(0.2-1.2)                                             | 0.9<br>(0.3-1.5)       | 1.1<br>(0.5-1.8)       | 1.4<br>(0.7-2.2)       | 1.8<br>(0.9-2.7)       |
| Adult 19–50      | 65.6<br>(62.7-68.6)                                | 59.4<br>(56.4-62.5)*   | 52.8<br>(49.6-55.9)*   | 45.7<br>(42.5-48.8)*   | 38.3<br>(35.2-41.4)*   | 0.6<br>(0.1-1.0)                                             | 0.7<br>(0.2-1.1)       | 0.8<br>(0.3-1.3)       | 1.0<br>(0.4-1.6)       | 1.3<br>(0.6-2.0)       |
| Male 51–70       | 73.0<br>(69.5-76.4)                                | 68.9<br>(65.3-72.5)    | 64.1<br>(60.4-67.8)*   | 58.4<br>(54.7-62.1)*   | 52.6<br>(48.8-56.3)*   | 0.6<br>(0.1-1.2)                                             | 0.7<br>(0.1-1.3)       | 0.8<br>(0.2-1.5)       | 1.1<br>(0.3-1.9)       | 1.3<br>(0.5-2.2)       |
| Female 51–70     | 72.3<br>(67.7-76.9)                                | 65.5<br>(60.6-70.4)    | 57.7<br>(52.3-63.0)*   | 49.1<br>(43.8-54.5)*   | 39.8<br>(34.7-44.9)*   | 1.4<br>(0.6-2.1)                                             | 1.6<br>(0.8-2.5)       | 2.0<br>(1.1-3.0)       | 2.5<br>(1.4-3.6)       | 3.1<br>(1.8-4.4)       |
| Adult 51–70      | 72.6<br>(70.1-75.2)                                | 67.3<br>(64.5-70.0)*   | 61.0<br>(57.9-64.1)*   | 53.9<br>(50.7-57.1)*   | 46.4<br>(43.1-49.7)*   | 1.0<br>(0.3-1.6)                                             | 1.2<br>(0.5-1.8)       | 1.4<br>(0.6-2.2)       | 1.8<br>(0.9-2.7)       | 2.2<br>(1.2-3.2)       |
| Adult 71+        | 82.8<br>(80.2-85.5)                                | 77.5<br>(74.3-80.7)    | 71.2<br>(67.5-75.0)*   | 64.0<br>(59.9-68.0)*   | 55.8<br>(51.2-60.4)*   | 2.4<br>(1.1-3.7)                                             | 2.9<br>(1.5-4.4)       | 3.5<br>(1.9-5.2)       | 4.3<br>(2.3-6.2)       | 5.2<br>(3.0-7.4)       |
| Male 19–71+      | 69.8<br>(67.5-72.2)                                | 65.2<br>(62.7-67.7)    | 60.0<br>(57.3-62.6)*   | 54.3<br>(51.6-57.1)*   | 48.3<br>(45.5-51.0)*   | 0.6<br>(0.2-1.0)                                             | 0.7<br>(0.2-1.1)       | 0.8<br>(0.3-1.3)       | 1.0<br>(0.4-1.6)       | 1.2<br>(0.5-1.9)       |
| Female 19–71+    | 69.3<br>(66.5-72.1)                                | 62.1<br>(59.2-65.1)*   | 54.1<br>(51.1-57.1)*   | 45.4<br>(42.5-48.4)*   | 36.3<br>(33.4-39.2)*   | 1.2<br>(0.6-1.8)                                             | 1.5<br>(0.8-2.1)       | 1.8<br>(1.0-2.6)       | 2.2<br>(1.4-3.1)       | 2.8<br>(1.8-3.8)       |
| Adult 19–71+     | 69.6<br>(67.4-71.8)                                | 63.7<br>(61.4-66.0)*   | 57.2<br>(54.8-59.6)*   | 50.1<br>(47.7-52.6)*   | 42.6<br>(40.2-45.0)*   | 0.9<br>(0.4-1.4)                                             | 1.0<br>(0.5-1.6)       | 1.3<br>(0.6-1.9)       | 1.6<br>(0.9-2.3)       | 2.0<br>(1.1-2.8)       |

\*95% confidence intervals of percentages from those below/above recommended and modeled replacement do not overlap

<sup>a</sup>EAR, estimated average requirement: A nutrient intake value that is estimated to meet the requirement of half the healthy individuals in a group

<sup>b</sup>AI, adequate intake, is a recommended average daily nutrient intake level assumed to be adequate based on experimentally derived intake levels or approximations of observed mean nutrient intake by a group (or groups) of apparently healthy people

<sup>c</sup>One ounce equivalent (eq) per Protein Foods Group is 0.5 oz nuts and 1 oz meat (20, p. 49). Therefore, we modeled the replacement of 1, 2, 3, and 4 oz eqs meat with 0.5, 1, 1.5, and 2 oz walnuts.

Supplemental Table S3: Percentage of individuals with nutrient intake levels above the AI<sup>a</sup> at current intake (usual diet) and modeled intake when replacing meat with equivalent<sup>b</sup> amount of walnuts

| Age-gender group | Potassium                            |                     |                     |                     |                      |
|------------------|--------------------------------------|---------------------|---------------------|---------------------|----------------------|
|                  | % above AI (95% confidence interval) |                     |                     |                     |                      |
|                  | Current                              | Replacement 1 oz eq | Replacement 2 oz eq | Replacement 3 oz eq | Replacement 4 oz eq  |
| Male 4–8         | 31.7<br>(26.4-37.0)                  | 30.4<br>(25.2-35.5) | 29.0<br>(23.9-34.0) | 27.9<br>(22.8-32.9) | 26.6<br>(21.6-31.6)  |
| Male 9–13        | 29.5<br>(24.9-34.0)                  | 28.4<br>(24.0-32.9) | 27.4<br>(23.0-31.8) | 26.3<br>(21.9-30.7) | 25.1<br>(20.7-29.5)  |
| Male 14–18       | 20.4<br>(15.8-25.1)                  | 19.7<br>(15.3-24.2) | 19.0<br>(14.6-23.5) | 18.2<br>(13.9-22.6) | 17.6<br>(13.4-21.8)  |
| Male 4–18        | 26.7<br>(24.0-29.5)                  | 25.7<br>(23.0-28.5) | 24.7<br>(22.0-27.4) | 23.7<br>(21.1-26.4) | 22.7<br>(20.1-25.4)  |
| Female 4–8       | 21.8<br>(18.1-25.4)                  | 20.5<br>(16.9-24.2) | 19.4<br>(15.8-23.0) | 18.3<br>(14.8-21.9) | 17.2<br>(13.7-20.7)  |
| Female 9–13      | 27.8<br>(23.4-32.2)                  | 26.6<br>(22.2-30.9) | 25.2<br>(20.9-29.4) | 23.9<br>(19.7-28.1) | 22.8<br>(18.7-26.8)  |
| Female 14–18     | 21.8<br>(17.1-26.4)                  | 20.8<br>(16.3-25.4) | 19.8<br>(15.2-24.3) | 18.7<br>(14.3-23.2) | 17.8<br>(13.5-22.1)  |
| Female 4–18      | 23.9<br>(21.5-26.4)                  | 22.8<br>(20.4-25.2) | 21.6<br>(19.2-24.0) | 20.4<br>(18.1-22.8) | 19.4<br>(17.1-21.7)  |
| Child 4–18       | 25.4<br>(23.3-27.5)                  | 24.3<br>(22.3-26.4) | 23.2<br>(21.2-25.3) | 22.2<br>(20.1-24.2) | 21.1<br>(19.1-23.2)* |
| Male 19–50       | 22.9<br>(20.3-25.6)                  | 22.3<br>(19.6-24.9) | 21.6<br>(19.0-24.3) | 21.0<br>(18.4-23.6) | 20.5<br>(17.9-23.0)  |
| Female 19–50     | 22.8<br>(19.6-26.1)                  | 21.9<br>(18.7-25.1) | 21.0<br>(17.8-24.2) | 20.2<br>(17.1-23.3) | 19.3<br>(16.2-22.4)  |
| Adult 19–50      | 22.9<br>(20.6-25.2)                  | 22.1<br>(19.8-24.4) | 21.4<br>(19.1-23.6) | 20.6<br>(18.4-22.9) | 19.9<br>(17.8-22.1)  |
| Male 51–70       | 25.3<br>(21.8-28.8)                  | 24.6<br>(21.1-28.1) | 23.9<br>(20.5-27.4) | 23.4<br>(20.0-26.7) | 22.7<br>(19.3-26.0)  |
| Female 51–70     | 23.9<br>(19.5-28.2)                  | 22.8<br>(18.5-27.2) | 21.8<br>(17.5-26.0) | 20.9<br>(16.7-25.0) | 20.0<br>(16.0-24.0)  |
| Adult 51–70      | 24.6<br>(22.3-26.9)                  | 23.7<br>(21.5-26.0) | 22.9<br>(20.6-25.1) | 22.1<br>(19.9-24.4) | 21.4<br>(19.2-23.5)  |
| Adult 71+        | 17.3<br>(14.5-20.1)                  | 16.3<br>(13.6-19.1) | 15.5<br>(12.9-18.2) | 14.7<br>(12.2-17.3) | 14.0<br>(11.5-16.5)  |
| Male 19–71+      | 22.9<br>(20.9-25.0)                  | 22.2<br>(20.2-24.3) | 21.6<br>(19.6-23.6) | 21.0<br>(19.0-23.0) | 20.4<br>(18.5-22.4)  |
| Female 19–71+    | 22.7<br>(20.5-24.9)                  | 21.7<br>(19.6-23.8) | 20.7<br>(18.6-22.9) | 19.9<br>(17.8-22.0) | 19.0<br>(17.0-21.0)  |
| Adult 19–71+     | 22.8<br>(21.1-24.5)                  | 22.0<br>(20.3-23.7) | 21.2<br>(19.5-22.9) | 20.5<br>(18.8-22.1) | 19.7<br>(18.1-21.4)  |

\*95% confidence intervals of percentages from those below/above recommended and modeled replacement do not overlap

<sup>a</sup>AI, adequate intake, is a recommended average daily nutrient intake level assumed to be adequate based on experimentally derived intake levels or approximations of observed mean nutrient intake by a group (or groups) of apparently healthy people

<sup>b</sup>One ounce equivalent (eq) per Protein Foods Group is 0.5 oz nuts and 1 oz meat (20, p. 49). Therefore, we modeled the replacement of 1, 2, 3, and 4 oz eqs meat with 0.5, 1, 1.5, and 2 oz walnuts.

Supplemental Table S4: Percentage of individuals with nutrient intakes below the EAR<sup>a</sup> at current intake (usual diet) and modeled intake when replacing meat with equivalent<sup>b</sup> amount of walnuts

| Age-gender group | Copper                                |                        |                        |                        |                        | Zinc                                  |                        |                        |                        |                        |
|------------------|---------------------------------------|------------------------|------------------------|------------------------|------------------------|---------------------------------------|------------------------|------------------------|------------------------|------------------------|
|                  | % below EAR (95% confidence interval) |                        |                        |                        |                        | % below EAR (95% confidence interval) |                        |                        |                        |                        |
|                  | Current                               | Replacement 1<br>oz eq | Replacement 2<br>oz eq | Replacement 3<br>oz eq | Replacement 4<br>oz eq | Current                               | Replacement 1<br>oz eq | Replacement 2<br>oz eq | Replacement 3<br>oz eq | Replacement 4<br>oz eq |
| Male 4–8         | 1.0<br>(0.5-1.5)                      | 0.0<br>(0.0-0.0)*      | 0.0<br>(0.0-0.0)*      | 0.0<br>(0.0-0.0)*      | 0.0<br>(0.0-0.0)*      | 1.6<br>(0.7-2.4)                      | 4.3<br>(2.5-6.1)*      | 9.5<br>(6.1-12.8)*     | 17.8<br>(12.9-22.7)*   | 28.5<br>(22.0-35.0)*   |
| Male 9–13        | 11.5<br>(7.5-15.6)                    | 0.9<br>(0.3-1.5)*      | 0.0<br>(0.0-0.0)*      | 0.0<br>(0.0-0.0)*      | 0.0<br>(0.0-0.0)*      | 17.9<br>(13.7-22.1)                   | 26.3<br>(21.2-31.4)    | 36.1<br>(30.2-42.0)*   | 45.3<br>(39.3-51.2)*   | 53.4<br>(47.9-58.9)*   |
| Male 14–18       | 26.6<br>(22.6-30.6)                   | 6.4<br>(4.5-8.2)*      | 0.5<br>(0.2-0.8)*      | 0.0<br>(0.0-0.0)*      | 0.0<br>(0.0-0.0)*      | 32.8<br>(27.5-38.1)                   | 40.6<br>(35.3-45.8)    | 47.8<br>(42.6-53.1)*   | 54.2<br>(49.2-59.2)*   | 59.9<br>(54.9-64.8)*   |
| Male 4–18        | 14.0<br>(11.7-16.3)                   | 2.7<br>(1.9-3.5)*      | 0.2<br>(0.1-0.3)*      | 0.0<br>(0.0-0.0)*      | 0.0<br>(0.0-0.0)*      | 18.6<br>(15.7-21.4)                   | 25.0<br>(22.0-28.0)*   | 32.4<br>(29.2-35.7)*   | 40.3<br>(37.0-43.6)*   | 48.3<br>(44.9-51.7)*   |
| Female 4–8       | 1.2<br>(0.6-1.8)                      | 0.0<br>(0.0-0.0)*      | 0.0<br>(0.0-0.0)*      | 0.0<br>(0.0-0.0)*      | 0.0<br>(0.0-0.0)*      | 3.8<br>(2.3-5.2)                      | 8.9<br>(6.3-11.4)*     | 17.8<br>(13.9-21.6)*   | 30.0<br>(25.1-34.9)*   | 44.3<br>(38.4-50.2)*   |
| Female 9–13      | 12.7<br>(8.8-16.6)                    | 0.9<br>(0.5-1.4)*      | 0.0<br>(0.0-0.0)*      | 0.0<br>(0.0-0.0)*      | 0.0<br>(0.0-0.0)*      | 28.5<br>(23.4-33.7)                   | 39.1<br>(33.6-44.7)    | 50.3<br>(44.5-56.2)*   | 59.9<br>(54.5-65.4)*   | 68.2<br>(62.9-73.4)*   |
| Female 14–18     | 38.8<br>(33.0-44.6)                   | 9.0<br>(6.1-12.0)*     | 0.6<br>(0.1-1.1)*      | 0.0<br>(0.0-0.0)*      | 0.0<br>(0.0-0.0)*      | 41.8<br>(36.1-47.6)                   | 52.7<br>(47.0-58.3)    | 62.2<br>(56.7-67.6)*   | 70.0<br>(64.9-75.2)*   | 76.4<br>(71.8-80.9)*   |
| Female 4–18      | 18.5<br>(15.4-21.7)                   | 3.5<br>(2.4-4.7)*      | 0.2<br>(0.1-0.4)*      | 0.0<br>(0.0-0.0)*      | 0.0<br>(0.0-0.0)*      | 26.0<br>(23.2-28.8)                   | 35.1<br>(32.0-38.1)*   | 45.0<br>(41.6-48.4)*   | 54.8<br>(51.3-58.2)*   | 64.1<br>(60.5-67.7)*   |
| Child 4–18       | 16.2<br>(14.0-18.3)                   | 3.1<br>(2.3-3.9)*      | 0.2<br>(0.1-0.3)*      | 0.0<br>(0.0-0.0)*      | 0.0<br>(0.0-0.0)*      | 22.1<br>(20.0-24.2)                   | 29.8<br>(27.5-32.1)*   | 38.4<br>(35.9-40.9)*   | 47.2<br>(44.7-49.7)*   | 55.8<br>(53.2-58.5)*   |
| Male 19–50       | 14.1<br>(11.6-16.6)                   | 2.5<br>(1.7-3.3)*      | 0.2<br>(0.1-0.3)*      | 0.0<br>(0.0-0.0)*      | 0.0<br>(0.0-0.0)*      | 32.6<br>(29.5-35.6)                   | 39.4<br>(36.3-42.5)*   | 46.0<br>(43.0-49.0)*   | 52.0<br>(48.9-55.0)*   | 57.0<br>(54.2-59.9)*   |
| Female 19–50     | 25.0<br>(21.7-28.3)                   | 4.6<br>(3.2-5.9)*      | 0.2<br>(0.0-0.3)*      | 0.0<br>(0.0-0.0)*      | 0.0<br>(0.0-0.0)*      | 30.8<br>(27.2-34.5)                   | 41.2<br>(37.0-45.3)*   | 51.6<br>(47.2-56.0)*   | 60.9<br>(56.6-65.2)*   | 68.7<br>(64.7-72.7)*   |
| Adult 19–50      | 19.1<br>(16.5-21.6)                   | 3.4<br>(2.5-4.4)*      | 0.2<br>(0.0-0.3)*      | 0.0<br>(0.0-0.0)*      | 0.0<br>(0.0-0.0)*      | 31.8<br>(29.3-34.3)                   | 40.2<br>(37.6-42.9)*   | 48.5<br>(45.9-51.2)*   | 56.0<br>(53.4-58.7)*   | 62.3<br>(59.9-64.8)*   |
| Male 51–70       | 12.7<br>(10.5-14.8)                   | 1.8<br>(1.1-2.5)*      | 0.1<br>(0.0-0.1)*      | 0.0<br>(0.0-0.0)*      | 0.0<br>(0.0-0.0)*      | 35.4<br>(31.9-39.0)                   | 43.2<br>(39.1-47.3)*   | 50.2<br>(45.9-54.5)*   | 56.3<br>(51.8-60.7)*   | 61.2<br>(57.0-65.4)*   |
| Female 51–70     | 25.6<br>(21.6-29.7)                   | 4.2<br>(2.7-5.6)*      | 0.1<br>(0.0-0.3)*      | 0.0<br>(0.0-0.0)*      | 0.0<br>(0.0-0.0)*      | 35.2<br>(31.2-39.2)                   | 46.8<br>(42.3-51.2)*   | 57.5<br>(52.6-62.4)*   | 66.5<br>(62.0-71.1)*   | 74.1<br>(69.9-78.3)*   |
| Adult 51–70      | 18.9<br>(16.2-21.7)                   | 3.0<br>(2.0-3.9)*      | 0.1<br>(0.0-0.2)*      | 0.0<br>(0.0-0.0)*      | 0.0<br>(0.0-0.0)*      | 35.3<br>(32.0-38.6)                   | 44.9<br>(41.3-48.6)*   | 53.7<br>(49.9-57.5)*   | 61.3<br>(57.6-64.9)*   | 67.4<br>(64.1-70.8)*   |
| Adult 71+        | 18.7<br>(11.1-26.3)                   | 2.1<br>(0.1-4.1)*      | 0.0<br>(0.1-0.1)*      | 0.0<br>(0.0-0.0)*      | 0.0<br>(0.0-0.0)*      | 44.9<br>(38.7-51.2)                   | 55.6<br>(49.6-61.6)    | 65.1<br>(59.6-70.7)*   | 73.3<br>(68.6-77.9)*   | 79.5<br>(75.5-83.4)*   |
| Male 19–71+      | 13.7<br>(12.0-15.5)                   | 2.2<br>(1.6-2.8)*      | 0.1<br>(0.0-0.2)*      | 0.0<br>(0.0-0.0)*      | 0.0<br>(0.0-0.0)*      | 35.0<br>(32.8-37.2)                   | 42.3<br>(40.0-44.5)*   | 49.1<br>(46.8-51.3)*   | 55.1<br>(52.8-57.3)*   | 60.0<br>(57.9-62.1)*   |
| Female 19–71+    | 24.8<br>(21.6-28.0)                   | 4.2<br>(2.9-5.5)*      | 0.2<br>(0.0-0.3)*      | 0.0<br>(0.0-0.0)*      | 0.0<br>(0.0-0.0)*      | 33.3<br>(30.8-35.9)                   | 44.4<br>(41.5-47.2)*   | 55.0<br>(51.9-58.1)*   | 64.3<br>(61.5-67.2)*   | 72.0<br>(69.5-74.5)*   |
| Adult 19–71+     | 19.0                                  | 3.2                    | 0.1                    | 0.0                    | 0.0                    | 34.2                                  | 43.3                   | 51.9                   | 59.4                   | 65.7                   |

|  |             |            |            |            |            |             |              |              |              |              |
|--|-------------|------------|------------|------------|------------|-------------|--------------|--------------|--------------|--------------|
|  | (16.8-21.2) | (2.3-4.0)* | (0.0-0.2)* | (0.0-0.0)* | (0.0-0.0)* | (32.5-36.0) | (41.3-45.3)* | (49.8-54.0)* | (57.4-61.5)* | (63.9-67.5)* |
|--|-------------|------------|------------|------------|------------|-------------|--------------|--------------|--------------|--------------|

\*95% confidence intervals of percentages from those below/above recommended and modeled replacement do not overlap

<sup>a</sup>EAR, estimated average requirement: A nutrient intake value that is estimated to meet the requirement of half the healthy individuals in a group

<sup>b</sup>One ounce equivalent (eq) per Protein Foods Group is 0.5 oz nuts and 1 oz meat (20, p. 49). Therefore, we modeled the replacement of 1, 2, 3, and 4 oz eqs meat with 0.5, 1, 1.5, and 2 oz walnuts.

Supplemental Table S5: AMDR<sup>a</sup> of protein intake (protein as % energy) at current intake and modeled intake when replacing meat with equivalent<sup>b</sup> amount of walnuts

| Age-gender group | Protein as % of Energy Intake<br>% within AMDR <sup>a</sup> (95% confidence interval) |                      |                      |                      |                      |
|------------------|---------------------------------------------------------------------------------------|----------------------|----------------------|----------------------|----------------------|
|                  | Current                                                                               | Replacement 1 oz eq  | Replacement 2 oz eq  | Replacement 3 oz eq  | Replacement 4 oz eq  |
| Male 4–8         | 96.9<br>(95.6-98.3)                                                                   | 89.2<br>(86.2-92.1)* | 71.7<br>(68.0-75.4)* | 48.9<br>(45.2-52.6)* | 31.2<br>(27.7-34.7)* |
| Male 9–13        | 97.1<br>(96.1-98.0)                                                                   | 90.8<br>(88.8-92.8)* | 75.7<br>(71.5-79.8)* | 54.7<br>(48.3-61.1)* | 38.5<br>(32.1-44.9)* |
| Male 14–18       | 98.1<br>(97.2-99.0)                                                                   | 94.0<br>(91.8-96.2)* | 82.5<br>(78.2-86.9)* | 64.6<br>(58.7-70.5)* | 49.0<br>(42.8-55.2)* |
| Male 4–18        | 97.4<br>(96.5-98.3)                                                                   | 91.5<br>(89.6-93.4)* | 77.0<br>(74.0-80.1)* | 56.7<br>(53.0-60.3)* | 40.2<br>(36.4-44.0)* |
| Female 4–8       | 94.4<br>(91.6-97.1)                                                                   | 80.2<br>(75.7-84.8)* | 56.3<br>(51.3-61.3)* | 32.7<br>(28.5-36.9)* | 17.4<br>(14.5-20.2)* |
| Female 9–13      | 94.2<br>(92.3-96.2)                                                                   | 82.1<br>(78.2-86.1)* | 60.3<br>(54.9-65.7)* | 38.0<br>(32.3-43.8)* | 23.0<br>(18.4-27.6)* |
| Female 14–18     | 96.9<br>(95.3-98.5)                                                                   | 88.4<br>(84.8-92.0)* | 67.9<br>(62.7-73.0)* | 43.4<br>(37.8-49.0)* | 26.2<br>(20.9-31.4)* |
| Female 4–18      | 95.2<br>(93.4-97.0)                                                                   | 83.8<br>(80.6-87.0)* | 61.8<br>(58.2-65.4)* | 38.4<br>(35.1-41.6)* | 22.5<br>(19.7-25.3)* |
| Child 4–18       | 96.4<br>(95.1-97.6)                                                                   | 87.8<br>(85.5-90.1)* | 69.8<br>(67.1-72.5)* | 48.0<br>(45.1-50.8)* | 31.8<br>(28.8-34.7)* |
| Male 19–50       | 98.6<br>(98.1-99.2)                                                                   | 96.2<br>(95.0-97.4)* | 89.0<br>(86.9-91.1)* | 75.6<br>(72.5-78.7)* | 61.4<br>(57.6-65.1)* |
| Female 19–50     | 98.0<br>(97.2-98.9)                                                                   | 92.2<br>(90.0-94.4)* | 76.7<br>(72.9-80.4)* | 54.1<br>(49.3-58.9)* | 35.2<br>(30.7-39.7)* |
| Adult 19–50      | 98.4<br>(97.8-99.0)                                                                   | 94.4<br>(92.9-95.9)* | 83.4<br>(80.9-85.9)* | 65.8<br>(62.4-69.3)* | 49.5<br>(45.9-53.1)* |
| Male 51–70       | 98.9<br>(98.4-99.5)                                                                   | 96.8<br>(95.4-98.1)* | 89.7<br>(86.4-93.0)* | 75.2<br>(70.6-79.8)* | 59.9<br>(55.4-64.4)* |
| Female 51–70     | 98.5<br>(97.4-99.6)                                                                   | 93.2<br>(90.3-96.1)* | 77.3<br>(72.0-82.6)* | 52.9<br>(47.2-58.5)* | 32.8<br>(28.2-37.5)* |
| Adult 51–70      | 98.7<br>(97.9-99.5)                                                                   | 95.0<br>(93.0-97.0)* | 83.7<br>(79.6-87.8)* | 64.4<br>(59.7-69.1)* | 46.8<br>(42.6-51.0)* |
| Adult 71+        | 98.7<br>(97.8-99.6)                                                                   | 93.4<br>(90.5-96.3)* | 78.2<br>(72.8-83.7)* | 55.3<br>(48.9-61.6)* | 34.2<br>(28.4-39.9)* |
| Male 19–71+      | 98.8<br>(98.3-99.3)                                                                   | 96.4<br>(95.2-97.5)* | 88.9<br>(86.6-91.2)* | 74.6<br>(71.7-77.6)* | 59.6<br>(56.5-62.7)* |
| Female 19–71+    | 98.2<br>(97.4-99.1)                                                                   | 92.4<br>(90.1-94.7)* | 76.3<br>(72.5-80.1)* | 52.7<br>(48.6-56.8)* | 33.1<br>(29.6-36.6)* |

|              |                     |                      |                      |                      |                      |
|--------------|---------------------|----------------------|----------------------|----------------------|----------------------|
| Adult 19–71+ | 98.5<br>(97.9-99.1) | 94.5<br>(92.9-96.0)* | 82.9<br>(80.3-85.6)* | 64.3<br>(61.3-67.3)* | 47.1<br>(44.2-49.9)* |
|--------------|---------------------|----------------------|----------------------|----------------------|----------------------|

\*95% confidence intervals of percentages from those below/above recommended and modeled replacement do not overlap

<sup>a</sup>The Acceptable Macronutrient Distribution Range (AMDR) (10%–35% of calories as protein)

<sup>b</sup>One ounce equivalent (eq) per Protein Foods Group is 0.5 oz nuts and 1 oz meat (20, p. 49). Therefore, we modeled the replacement of 1, 2, 3, and 4 oz eqs meat with 0.5, 1, 1.5, and 2 oz walnuts.

Supplemental Table S6: Saturated fat intake in grams and percentage of individuals with cholesterol intake levels above 300 mg at current intake (usual diet) and modeled for replacing meat with an equivalent<sup>a</sup> amount of walnuts

| Age-gender group | Saturated Fat<br>Grams<br>(95% confidence interval) |                        |                        |                        |                        | Cholesterol<br>% above 300 mg (95% confidence interval) |                        |                        |                        |                        |
|------------------|-----------------------------------------------------|------------------------|------------------------|------------------------|------------------------|---------------------------------------------------------|------------------------|------------------------|------------------------|------------------------|
|                  | Current                                             | Replacement 1<br>oz eq | Replacement 2<br>oz eq | Replacement 3<br>oz eq | Replacement 4<br>oz eq | Current                                                 | Replacement 1<br>oz eq | Replacement 2<br>oz eq | Replacement 3<br>oz eq | Replacement 4<br>oz eq |
| Male 4–8         | 24.2<br>(22.6-25.8)                                 | 24.3<br>(22.7-25.9)    | 24.4<br>(22.8-26.0)    | 24.5<br>(22.9-26.1)    | 24.6<br>(23.0-26.2)    | 18.9<br>(16.0-21.7)                                     | 15.3<br>(12.7-18.0)    | 12.2<br>(9.7-14.7)*    | 9.6<br>(7.2-12.0)*     | 7.3<br>(5.2-9.3)*      |
| Male 9–13        | 27.4<br>(25.9-28.8)                                 | 27.5<br>(26.0-28.9)    | 27.6<br>(26.1-29.0)    | 27.7<br>(26.2-29.1)    | 27.8<br>(26.3-29.3)    | 28.8<br>(24.4-33.3)                                     | 24.2<br>(20.1-28.3)    | 20.6<br>(16.8-24.3)*   | 17.2<br>(13.9-20.5)*   | 14.4<br>(11.4-17.4)*   |
| Male 14–18       | 30.1<br>(28.2-32.0)                                 | 30.2<br>(28.3-32.1)    | 30.3<br>(28.4-32.2)    | 30.4<br>(28.5-32.3)    | 30.5<br>(28.6-32.4)    | 38.2<br>(31.9-44.6)                                     | 33.1<br>(27.2-38.9)    | 29.0<br>(23.7-34.3)    | 25.3<br>(20.2-30.5)*   | 21.6<br>(16.8-26.4)*   |
| Male 4–18        | 27.4<br>(26.4-28.5)                                 | 27.5<br>(26.5-28.6)    | 27.6<br>(26.6-28.7)    | 27.7<br>(26.7-28.8)    | 27.8<br>(26.8-28.9)    | 29.4<br>(26.4-32.4)                                     | 24.9<br>(22.1-27.6)    | 21.2<br>(18.6-23.8)*   | 18.0<br>(15.5-20.4)*   | 15.0<br>(12.7-17.2)*   |
| Female 4–8       | 21.6<br>(20.4-22.9)                                 | 21.7<br>(20.5-23.0)    | 21.8<br>(20.6-23.1)    | 22.0<br>(20.7-23.2)    | 22.1<br>(20.8-23.3)    | 11.5<br>(8.6-14.3)                                      | 9.0<br>(6.3-11.6)      | 6.7<br>(4.4-8.9)       | 4.9<br>(3.0-6.9)*      | 3.5<br>(1.9-5.0)*      |
| Female 9–13      | 25.0<br>(23.9-26.1)                                 | 25.1<br>(24.0-26.2)    | 25.2<br>(24.1-26.3)    | 25.3<br>(24.2-26.5)    | 25.4<br>(24.3-26.6)    | 19.3<br>(15.6-23.0)                                     | 15.4<br>(11.9-19.0)    | 12.5<br>(9.3-15.6)*    | 9.8<br>(7.2-12.5)*     | 7.8<br>(5.6-10.0)*     |
| Female 14–18     | 23.4<br>(21.9-24.9)                                 | 23.5<br>(22.0-25.0)    | 23.6<br>(22.1-25.1)    | 23.7<br>(22.2-25.3)    | 23.8<br>(22.3-25.4)    | 19.6<br>(15.7-23.6)                                     | 16.1<br>(12.4-19.8)    | 12.8<br>(9.5-16.2)     | 10.5<br>(7.8-13.2)*    | 8.6<br>(6.1-11.0)*     |
| Female 4–18      | 23.5<br>(22.6-24.3)                                 | 23.6<br>(22.7-24.4)    | 23.7<br>(22.8-24.5)    | 23.8<br>(22.9-24.6)    | 23.9<br>(23.0-24.7)    | 17.1<br>(14.7-19.6)                                     | 13.8<br>(11.4-16.1)    | 10.9<br>(8.8-13.0)*    | 8.6<br>(6.9-10.4)*     | 6.8<br>(5.3-8.3)*      |
| Child 4–18       | 25.5<br>(24.8-26.3)                                 | 25.6<br>(24.9-26.4)    | 25.7<br>(25.0-26.5)    | 25.9<br>(25.1-26.6)    | 26.0<br>(25.2-26.7)    | 23.5<br>(21.3-25.8)                                     | 19.6<br>(17.4-21.7)    | 16.3<br>(14.3-18.3)*   | 13.5<br>(11.7-15.3)*   | 11.1<br>(9.5-12.7)*    |
| Male 19–50       | 31.8<br>(30.6-33.1)                                 | 31.9<br>(30.7-33.2)    | 32.1<br>(30.8-33.3)    | 32.2<br>(30.9-33.4)    | 32.3<br>(31.0-33.5)    | 55.4<br>(52.2-58.6)                                     | 49.9<br>(46.6-53.2)    | 45.0<br>(41.9-48.1)*   | 40.8<br>(37.8-43.8)*   | 36.8<br>(33.8-39.8)*   |
| Female 19–50     | 23.4<br>(22.5-24.3)                                 | 23.5<br>(22.6-24.4)    | 23.6<br>(22.7-24.5)    | 23.7<br>(22.8-24.6)    | 23.8<br>(22.9-24.7)    | 31.6<br>(28.3-35.0)                                     | 26.6<br>(23.5-29.8)    | 22.2<br>(19.3-25.2)*   | 18.8<br>(16.1-21.6)*   | 15.8<br>(13.2-18.4)*   |
| Adult 19–50      | 28.0<br>(27.1-28.9)                                 | 28.1<br>(27.2-29.0)    | 28.2<br>(27.3-29.1)    | 28.3<br>(27.4-29.2)    | 28.4<br>(27.5-29.3)    | 44.6<br>(41.9-47.3)                                     | 39.3<br>(36.7-42.0)    | 34.7<br>(32.2-37.2)*   | 30.8<br>(28.4-33.2)*   | 27.3<br>(24.9-29.6)*   |
| Male 51–70       | 29.8<br>(27.9-31.7)                                 | 29.9<br>(28.1-31.8)    | 30.0<br>(28.2-31.9)    | 30.1<br>(28.3-32.0)    | 30.3<br>(28.4-32.1)    | 55.3<br>(49.9-60.8)                                     | 49.6<br>(44.0-55.3)    | 44.5<br>(39.1-49.9)    | 40.0<br>(34.6-45.5)*   | 35.8<br>(30.4-41.1)*   |
| Female 51–70     | 21.7<br>(19.9-23.6)                                 | 21.8<br>(20.0-23.7)    | 21.9<br>(20.1-23.8)    | 22.0<br>(20.2-23.9)    | 22.2<br>(20.3-24.0)    | 29.8<br>(24.9-34.7)                                     | 24.5<br>(20.2-28.9)    | 20.2<br>(16.1-24.4)*   | 16.8<br>(13.1-20.5)*   | 13.7<br>(10.4-17.1)*   |
| Adult 51–70      | 25.9<br>(24.5-27.3)                                 | 26.0<br>(24.6-27.4)    | 26.1<br>(24.7-27.5)    | 26.2<br>(24.9-27.6)    | 26.3<br>(25.0-27.7)    | 43.0<br>(38.9-47.0)                                     | 37.5<br>(33.6-41.3)    | 32.8<br>(29.1-36.4)*   | 28.8<br>(25.3-32.2)*   | 25.1<br>(21.9-28.3)*   |
| Adult 71+        | 22.4<br>(21.2-23.5)                                 | 22.5<br>(21.3-23.6)    | 22.6<br>(21.4-23.7)    | 22.7<br>(21.6-23.9)    | 22.8<br>(21.7-24.0)    | 30.4<br>(24.8-36.1)                                     | 25.1<br>(20.0-30.3)    | 20.8<br>(16.3-25.2)    | 17.2<br>(13.3-21.0)*   | 14.2<br>(10.8-17.7)*   |
| Male 19–71+      | 30.7<br>(29.7-31.6)                                 | 30.8<br>(29.8-31.7)    | 30.9<br>(29.9-31.8)    | 31.0<br>(30.0-32.0)    | 31.1<br>(30.1-32.1)    | 54.0<br>(51.2-56.9)                                     | 48.5<br>(45.7-51.2)    | 43.5<br>(40.9-46.1)*   | 39.2<br>(36.7-41.6)*   | 35.1<br>(32.8-37.5)*   |

|               |                     |                     |                     |                     |                     |                     |                      |                      |                      |                      |
|---------------|---------------------|---------------------|---------------------|---------------------|---------------------|---------------------|----------------------|----------------------|----------------------|----------------------|
| Female 19–71+ | 22.4<br>(21.7-23.2) | 22.5<br>(21.8-23.3) | 22.6<br>(21.9-23.4) | 22.8<br>(22.0-23.5) | 22.9<br>(22.1-23.6) | 29.9<br>(26.9-32.8) | 24.8<br>(22.1-27.5)  | 20.5<br>(18.0-23.0)* | 17.1<br>(14.8-19.4)* | 14.2<br>(12.1-16.3)* |
| Adult 19–71+  | 26.8<br>(26.1-27.4) | 26.9<br>(26.2-27.5) | 27.0<br>(26.3-27.6) | 27.1<br>(26.4-27.7) | 27.2<br>(26.6-27.8) | 42.6<br>(40.3-44.9) | 37.3<br>(35.1-39.4)* | 32.6<br>(30.6-34.6)* | 28.7<br>(26.9-30.6)* | 25.2<br>(23.5-27.0)* |

\*95% confidence intervals of percentages from those below/above recommended and modeled replacement do not overlap

<sup>a</sup>One ounce equivalent (eq) per Protein Foods Group is 0.5 oz nuts and 1 oz meat (20, p. 49). Therefore, we modeled the replacement of 1, 2, 3, and 4 oz eqs meat with 0.5, 1, 1.5, and 2 oz walnuts.

Supplemental Table S7: Percentage of individuals with nutrient intake levels above the AI<sup>a</sup> at current intake (usual diet) and modeled at replacing meat with an equivalent<sup>b</sup> amount of walnuts

| Age-gender group | Omega-6<br>% above AI (95% confidence interval) |                        |                         |                         |                         | Omega-3<br>% above AI (95% confidence interval) |                         |                         |                         |                         |
|------------------|-------------------------------------------------|------------------------|-------------------------|-------------------------|-------------------------|-------------------------------------------------|-------------------------|-------------------------|-------------------------|-------------------------|
|                  | Current                                         | Replacement 1<br>oz eq | Replacement 2<br>oz eq  | Replacement 3<br>oz eq  | Replacement 4<br>oz eq  | Current                                         | Replacement 1<br>oz eq  | Replacement 2<br>oz eq  | Replacement 3<br>oz eq  | Replacement 4<br>oz eq  |
| Male 4–8         | 61.7<br>(56.3-67.1)                             | 97.4<br>(96.1-98.7)*   | 100.0<br>(100.0-100.0)* | 100.0<br>(100.0-100.0)* | 100.0<br>(100.0-100.0)* | 69.9<br>(64.6-75.2)                             | 100.0<br>(100.0-100.0)* | 100.0<br>(100.0-100.0)* | 100.0<br>(100.0-100.0)* | 100.0<br>(100.0-100.0)* |
| Male 9–13        | 60.7<br>(57.2-64.2)                             | 92.7<br>(90.0-95.3)*   | 99.9<br>(99.7-100.0)*   | 100.0<br>(100.0-100.0)* | 100.0<br>(100.0-100.0)* | 57.9<br>(53.4-62.4)                             | 100.0<br>(99.9-100.0)*  | 100.0<br>(100.0-100.0)* | 100.0<br>(100.0-100.0)* | 100.0<br>(100.0-100.0)* |
| Male 14–18       | 43.2<br>(37.0-49.4)                             | 73.1<br>(67.6-78.5)*   | 96.1<br>(94.3-98.0)*    | 100.0<br>(99.9-100.0)*  | 100.0<br>(100.0-100.0)* | 43.0<br>(36.5-49.5)                             | 98.7<br>(98.0-99.5)*    | 100.0<br>(100.0-100.0)* | 100.0<br>(100.0-100.0)* | 100.0<br>(100.0-100.0)* |
| Male 4–18        | 54.4<br>(51.4-57.5)                             | 86.8<br>(84.3-89.3)*   | 98.5<br>(97.8-99.2)*    | 100.0<br>(100.0-100.0)* | 100.0<br>(100.0-100.0)* | 55.9<br>(52.3-59.5)                             | 99.5<br>(99.2-99.8)*    | 100.0<br>(100.0-100.0)* | 100.0<br>(100.0-100.0)* | 100.0<br>(100.0-100.0)* |
| Female 4–8       | 59.8<br>(54.6-64.9)                             | 97.3<br>(96.0-98.7)*   | 100.0<br>(100.0-100.0)* | 100.0<br>(100.0-100.0)* | 100.0<br>(100.0-100.0)* | 70.1<br>(65.1-75.1)                             | 100.0<br>(100.0-100.0)* | 100.0<br>(100.0-100.0)* | 100.0<br>(100.0-100.0)* | 100.0<br>(100.0-100.0)* |
| Female 9–13      | 74.7<br>(70.6-78.8)                             | 98.9<br>(98.2-99.5)*   | 100.0<br>(100.0-100.0)* | 100.0<br>(100.0-100.0)* | 100.0<br>(100.0-100.0)* | 72.6<br>(67.6-77.6)                             | 100.0<br>(100.0-100.0)* | 100.0<br>(100.0-100.0)* | 100.0<br>(100.0-100.0)* | 100.0<br>(100.0-100.0)* |
| Female 14–18     | 58.1<br>(51.9-64.3)                             | 95.1<br>(93.2-97.0)*   | 100.0<br>(100.0-100.0)* | 100.0<br>(100.0-100.0)* | 100.0<br>(100.0-100.0)* | 58.2<br>(51.7-64.6)                             | 100.0<br>(100.0-100.0)* | 100.0<br>(100.0-100.0)* | 100.0<br>(100.0-100.0)* | 100.0<br>(100.0-100.0)* |
| Female 4–18      | 64.5<br>(61.6-67.4)                             | 97.1<br>(96.2-98.0)*   | 100.0<br>(100.0-100.0)* | 100.0<br>(100.0-100.0)* | 100.0<br>(100.0-100.0)* | 66.8<br>(63.5-70.1)                             | 100.0<br>(100.0-100.0)* | 100.0<br>(100.0-100.0)* | 100.0<br>(100.0-100.0)* | 100.0<br>(100.0-100.0)* |
| Child 4–18       | 59.2<br>(57.1-61.3)                             | 91.7<br>(90.2-93.1)*   | 99.2<br>(98.8-99.6)*    | 100.0<br>(100.0-100.0)* | 100.0<br>(100.0-100.0)* | 61.1<br>(58.4-63.8)                             | 99.7<br>(99.6-99.9)*    | 100.0<br>(100.0-100.0)* | 100.0<br>(100.0-100.0)* | 100.0<br>(100.0-100.0)* |
| Male 19–50       | 48.6<br>(45.7-51.4)                             | 75.5<br>(72.6-78.3)*   | 95.4<br>(94.1-96.7)*    | 99.9<br>(99.9-100.0)*   | 100.0<br>(100.0-100.0)* | 56.6<br>(53.3-59.8)                             | 99.5<br>(99.2-99.8)*    | 100.0<br>(100.0-100.0)* | 100.0<br>(100.0-100.0)* | 100.0<br>(100.0-100.0)* |
| Female 19–50     | 56.4<br>(52.6-60.2)                             | 91.8<br>(89.6-93.9)*   | 99.9<br>(99.9-100.0)*   | 100.0<br>(100.0-100.0)* | 100.0<br>(100.0-100.0)* | 68.6<br>(65.1-72.1)                             | 100.0<br>(100.0-100.0)* | 100.0<br>(100.0-100.0)* | 100.0<br>(100.0-100.0)* | 100.0<br>(100.0-100.0)* |
| Adult 19–50      | 52.1<br>(49.6-54.6)                             | 82.9<br>(80.8-84.9)*   | 97.5<br>(96.7-98.2)*    | 100.0<br>(99.9-100.0)*  | 100.0<br>(100.0-100.0)* | 62.0<br>(59.4-64.7)                             | 99.7<br>(99.5-99.9)*    | 100.0<br>(100.0-100.0)* | 100.0<br>(100.0-100.0)* | 100.0<br>(100.0-100.0)* |
| Male 51–70       | 56.2<br>(51.0-61.4)                             | 88.3<br>(85.7-90.9)*   | 99.4<br>(99.1-99.8)*    | 100.0<br>(100.0-100.0)* | 100.0<br>(100.0-100.0)* | 51.9<br>(46.9-57.0)                             | 99.6<br>(99.3-99.9)*    | 100.0<br>(100.0-100.0)* | 100.0<br>(100.0-100.0)* | 100.0<br>(100.0-100.0)* |
| Female 51–70     | 54.7<br>(49.8-59.6)                             | 94.9<br>(93.2-96.7)*   | 100.0<br>(100.0-100.0)* | 100.0<br>(100.0-100.0)* | 100.0<br>(100.0-100.0)* | 63.5<br>(58.2-68.9)                             | 100.0<br>(100.0-100.0)* | 100.0<br>(100.0-100.0)* | 100.0<br>(100.0-100.0)* | 100.0<br>(100.0-100.0)* |
| Adult 51–70      | 55.4<br>(51.6-59.3)                             | 91.5<br>(89.6-93.4)*   | 99.7<br>(99.5-99.9)*    | 100.0<br>(100.0-100.0)* | 100.0<br>(100.0-100.0)* | 57.6<br>(53.6-61.5)                             | 99.8<br>(99.6-100.0)*   | 100.0<br>(100.0-100.0)* | 100.0<br>(100.0-100.0)* | 100.0<br>(100.0-100.0)* |
| Adult 71+        | 45.9<br>(37.5-54.3)                             | 88.6<br>(84.0-93.1)*   | 99.6<br>(99.3-100.0)*   | 100.0<br>(100.0-100.0)* | 100.0<br>(100.0-100.0)* | 54.3<br>(46.7-61.8)                             | 99.9<br>(99.7-100.0)*   | 100.0<br>(100.0-100.0)* | 100.0<br>(100.0-100.0)* | 100.0<br>(100.0-100.0)* |
| Male 19–71+      | 50.1<br>(48.0-52.1)                             | 79.8<br>(77.7-81.9)*   | 96.9<br>(96.1-97.8)*    | 100.0<br>(99.9-100.0)*  | 100.0<br>(100.0-100.0)* | 53.7<br>(51.2-56.2)                             | 99.5<br>(99.3-99.8)*    | 100.0<br>(100.0-100.0)* | 100.0<br>(100.0-100.0)* | 100.0<br>(100.0-100.0)* |

|               |                     |                      |                        |                         |                         |                     |                         |                         |                         |                         |
|---------------|---------------------|----------------------|------------------------|-------------------------|-------------------------|---------------------|-------------------------|-------------------------|-------------------------|-------------------------|
| Female 19–71+ | 55.1<br>(52.8-57.5) | 93.1<br>(91.6-94.6)* | 100.0<br>(99.9-100.0)* | 100.0<br>(100.0-100.0)* | 100.0<br>(100.0-100.0)* | 66.8<br>(64.4-69.1) | 100.0<br>(100.0-100.0)* | 100.0<br>(100.0-100.0)* | 100.0<br>(100.0-100.0)* | 100.0<br>(100.0-100.0)* |
| Adult 19–71+  | 52.5<br>(50.8-54.2) | 86.1<br>(84.6-87.6)* | 98.4<br>(97.9-98.8)*   | 100.0<br>(100.0-100.0)* | 100.0<br>(100.0-100.0)* | 59.9<br>(57.9-61.8) | 99.8<br>(99.6-99.9)*    | 100.0<br>(100.0-100.0)* | 100.0<br>(100.0-100.0)* | 100.0<br>(100.0-100.0)* |

\*95% confidence intervals of percentages from those below/above recommended and modeled replacement do not overlap

<sup>a</sup>AI, adequate intake, is a recommended average daily nutrient intake level assumed to be adequate based on experimentally derived intake levels or approximations of observed mean nutrient intake by a group (or groups) of apparently healthy people

<sup>b</sup>One ounce equivalent (eq) per Protein Foods Group is 0.5 oz nuts and 1 oz meat (20, p. 49). Therefore, we modeled the replacement of 1, 2, 3, and 4 oz eqs meat with 0.5, 1, 1.5, and 2 oz walnuts.
